# Supplementary material
Source: publisher site journal article supplement (https://www.dovepress.com/article/353199)
Supplement: Supplementary file 1 [file get_supplementary_file.php]

This paper is a retrospective study. The following is the detailed design program for the study.

**Purpose of study:**

we aimed at developing and validating the nomogram to predict the possibility of cardiac microvascular obstruction (CMVO) after primary percutaneous coronary intervention (PCI) by integrating clinical and laboratory-based information.

**Study population:**

we included finally 325 patients with non-ST elevation myocardial infarction (NSTEMI). The detailed inclusion and exclusion criteria of NSTEMI patientse were included in the manuscript.

**Inclusion criteria of patients:**

(1) patients were diagnosed with non-ST elevation myocardial infarction (NSTEMI);

(2) The patients were performed primary PCI within 24 hours of the onset of symptoms;

**Exclusion criteria of NSTEMI patients:**

1) age <18 years old; 2) Patients had not undergone DE-CMR; 3) Patients with any one of the following diseases: cardiogenic shock, immunological or rheumatic diseases, severe liver, and kidney dysfunction (require liver and kidney replacement therapy), malignant tumors, bleeding disorders, and contraindication for the anticoagulant or antiplatelet agents; 4) Killip IV grade; 5) Patients with severely missing clinical data.

In addition, a literature of JAMA divided the overall data into training sets and validation sets on a 7:3 principle.[1] In this study, a total of 325 patients with NSTEMI were divided into the training cohort (226 cases) and the validation cohort (99 cases).

**Definition of CMVO:**

Delay-enhanced cardiovascular magnetic resonance (DE-CMR) was performed to assess CMVO within 5-7 days after successful reperfusion. In DE-CMR, the infarct area shows as the high signal area in the enhanced area, and CMVO appears as a low signal area in the center of the high signal.

**Selection of model candidate variables:**

The candidate variables were first selected by univariate logistic regression analysis in the train set, and the candidate variables from P-value < 0.05 in the univariate logistic regression analysis were analyzed in the multivariable logistic regression analysis. Finally, variables with a P-value < 0.05 in the multivariable logistic regression analysis were included to the predictive model, and the regression coefficients and OR with two-sided 95% CIs of each variable in the prediction model were calculated and visualized in the form of nomogram.

**Evaluation and validation of the predictive models:**

We evaluated the predictive model in terms of three quantities, namely discriminative capacity, calibration ability, and clinical effectiveness. The area under the receiver operating characteristics curve (AUC-ROC), which is equal to the C-statistic in logical regression analysis, was used to evaluate discriminative capacity. Calibration accuracy was evaluated by a calibration plot and Hosmer–Lemeshow test. Clinical effectiveness was evaluated by a decision curve analysis (DCA). In addition, we performed external validation of the prediction model by using the validation cohort, which increased the stability of the use of the prediction model.

**Estimation of sample size for developing model:**

When developing prediction models for binary or time-to-event outcomes, an established rule of thumb for the required sample size is to ensure at least 10 events for each predictor parameter (ie, each β term in the regression equation) being considered for inclusion in the prediction model equation. This is widely referred to as needing at least 10 events per variable (10 EPV).[2] In the training cohort, we used data from 226 NSTEMI patients, 98 with CMVO and 128 without, to develop a predictive model for predicting coronary microvascular obstruction in NSTEMI patients after primary PCI. In addition, 7 variables have been included in the nomogram. The covariables (N=7) were compared to the number of CMVO events (N=98), which conforms to 10 EPV principle in terms of sample size. In addition, the validating cohort of some high score literature, including JAMA, and JOURNAL OF CLINICAL ONCOLOGY, don't conform to 10 EPV principle[3-4], So, the sample size of the validating cohort don't need to conform to 10 EPV principle.

**Reference**

[1] Lin JX, Wang ZK, Hong QQ, et al. Assessment of Clinicopathological Characteristics and Development of an Individualized Prognostic Model for Patients With Hepatoid Adenocarcinoma of the Stomach. JAMA Netw Open. 2021 Oct 1;4(10):e2128217.

[2] Riley RD, Ensor J, Snell KIE, et al. Calculating the sample size required for developing a clinical prediction model. BMJ. 2020 Mar 18;368:m441.

[3] Wang W, Peng Y, Feng X, et al. Development and Validation of a Computed Tomography-Based Radiomics Signature to Predict Response to Neoadjuvant Chemotherapy for Locally Advanced Gastric Cancer. JAMA Netw Open. 2021 Aug 2;4(8):e2121143.

[4] Carmona-Bayonas A, Jiménez-Fonseca P, Lamarca Á, et al. Prediction of Progression-Free Survival in Patients With Advanced, Well-Differentiated, Neuroendocrine Tumors Being Treated With a Somatostatin Analog: The GETNE-TRASGU Study. J Clin Oncol. 2019 Oct 1;37(28):2571-2580.
